# Supplementary material for: Geography of Genetic Structure in Barley Wild Relative Hordeum vulgare subsp. spontaneum in Jordan
Source: PubMed Central journal article supplement (PMC4981475; doi:10.1371/journal.pone.0160745), 2016-08-11
Supplement: pone.0160745.s001.pdf [file pone.0160745.s001.pdf]

## S1 Resource. Correlation analyses between genetic, geographic and environmental data

Geography of genetic structure in barley wild relative *Hordeum vulgare* subsp. *spontaneum* in Jordan

PLoS ONE

Thormann I. et al.

### Two-tailed Mantel test results for isolation by distance and by environment

| Type of distances between populations | Description                                                          |
|---------------------------------------|----------------------------------------------------------------------|
| GenDist(Fst/(1-Fst))                  | Genetic distances based on Fst/(1-Fst)                               |
| GenDist(FPTest)                       | Genetic distances based on allele counts calculated with FPTEST [89] |
| GenDist(AllelRich)                    | Genetic distance based on allelic richness                           |
| LnGeoDist                             | Logarithm of geographic distances in km                              |
| EnvDist                               | Environmental distances based on Bioclim variables PCoA              |

#### All 32 populations

| r/p                  | LnGeoDist           | EnvDist             | GenDist (FPTest)    |
|----------------------|---------------------|---------------------|---------------------|
| GenDist(Fst/(1-Fst)) | 0.29486/<br>0.00042 | 0.16197/<br>0.17396 | 0.39238/<br>0.00038 |
| LnGeoDist            | --                  | 0.40156/<br>0.00001 | 0.19402/<br>0.02009 |
| EnvDist              |                     | --                  | 0.07315/<br>0.45288 |

#### Cluster 1 and 2 (28 populations)

| r/p                  | LnGeoDist           | EnvDist              | GenDist (FPTest)       |
|----------------------|---------------------|----------------------|------------------------|
| GenDist(Fst/(1-Fst)) | 0.06014/<br>0.55819 | -0.07475/<br>0.56571 | 0.55219/<br>0.00047    |
| LnGeoDist            | --                  | 0.07321/<br>0.34933  | -0.03102/<br>0.73936   |
| EnvDist              |                     | --                   | -0.1322601/<br>0.21046 |

### Partial Mantel test results between environmental and geographic distances

EnvDist/LnGeoDist

#### All 32 populations

r=0.375  
p=0.0001

#### Cluster 1 and 2 (28 populations)

r=0.078  
p=0.316

**Pairwise distances among populations**

| GenDist (FPTest)) | GenDist (Fst/(1-Fst)) | LnGeoDist | EnvDist  |
|-------------------|-----------------------|-----------|----------|
| 15                | 0.112896              | 0.412110  | 0.255073 |
| 5                 | 0.305781              | 2.099244  | 1.013590 |
| 12                | 0.185880              | 2.590017  | 0.180762 |
| 53                | 0.646681              | 3.360375  | 0.933676 |
| 10                | 0.337385              | 3.110399  | 0.132297 |
| 32                | 0.519436              | 3.528417  | 1.208091 |
| 21                | 0.162732              | 3.389462  | 1.262319 |
| 2                 | 0.292040              | 3.593194  | 1.570917 |
| 7                 | 0.198974              | 3.801091  | 1.744536 |
| 1                 | 0.314015              | 3.990834  | 1.339027 |
| 4                 | 0.191638              | 3.749033  | 1.671406 |
| 14                | 0.217124              | 3.913422  | 1.215445 |
| 6                 | 0.237751              | 3.987872  | 0.745869 |
| 34                | 0.598911              | 4.147727  | 1.058673 |
| 13                | 0.279402              | 4.145830  | 0.037163 |
| 20                | 0.250887              | 4.201553  | 1.157584 |
| 0                 | 0.219599              | 4.254335  | 1.896805 |
| 4                 | 0.229597              | 4.258870  | 1.946168 |
| 25                | 0.209620              | 4.293878  | 1.646949 |
| 18                | 0.239109              | 4.342506  | 1.439009 |
| 13                | 0.342464              | 4.634826  | 1.568469 |
| 10                | 0.321274              | 4.725262  | 1.607242 |
| 11                | 0.383812              | 4.745193  | 1.513266 |
| 2                 | 0.314361              | 4.841190  | 1.095632 |
| 8                 | 0.242681              | 4.863372  | 1.270136 |
| 6                 | 0.265652              | 5.127292  | 1.357421 |
| 8                 | 0.353595              | 5.215370  | 1.798254 |
| 12                | 0.403876              | 5.417033  | 2.572677 |
| 36                | 0.486062              | 5.429828  | 2.104698 |
| 38                | 0.480534              | 5.539929  | 2.587051 |
| 29                | 0.421809              | 5.550359  | 2.640546 |
| 20                | 0.218476              | 1.897620  | 0.758517 |
| 3                 | 0.128407              | 2.588516  | 0.074312 |
| 68                | 0.436611              | 3.306520  | 0.678603 |
| 25                | 0.237423              | 3.102791  | 0.122776 |
| 47                | 0.332082              | 3.486151  | 0.953018 |
| 6                 | 0.100795              | 3.371425  | 1.007246 |
| 13                | 0.243710              | 3.573469  | 1.315844 |
| 8                 | 0.138353              | 3.774828  | 1.489463 |
| 14                | 0.193114              | 3.964805  | 1.083954 |
| 11                | 0.143596              | 3.730981  | 1.416333 |
| 1                 | 0.155763              | 3.891820  | 0.960372 |
| 9                 | 0.179381              | 3.968592  | 0.490796 |
| 49                | 0.440156              | 4.132764  | 0.803600 |
| 2                 | 0.196123              | 4.137564  | 0.217910 |
| 5                 | 0.192890              | 4.187379  | 0.902511 |
| 15                | 0.132527              | 4.244774  | 1.641732 |
| 11                | 0.177412              | 4.249352  | 1.691095 |
| 10                | 0.128600              | 4.283311  | 1.391876 |
| 3                 | 0.164703              | 4.333493  | 1.183936 |
| 28                | 0.218747              | 4.627225  | 1.313396 |
| 5                 | 0.251873              | 4.716890  | 1.352169 |
| 26                | 0.242390              | 4.738652  | 1.258193 |
| 13                | 0.202609              | 4.835170  | 0.840560 |
| 7                 | 0.145636              | 4.857640  | 1.015063 |
| 9                 | 0.158919              | 5.123309  | 1.102347 |
| 23                | 0.215894              | 5.211724  | 1.543181 |
| 27                | 0.328531              | 5.414232  | 2.317604 |
| 51                | 0.331773              | 5.427106  | 1.849625 |
| 53                | 0.405709              | 5.537649  | 2.331978 |

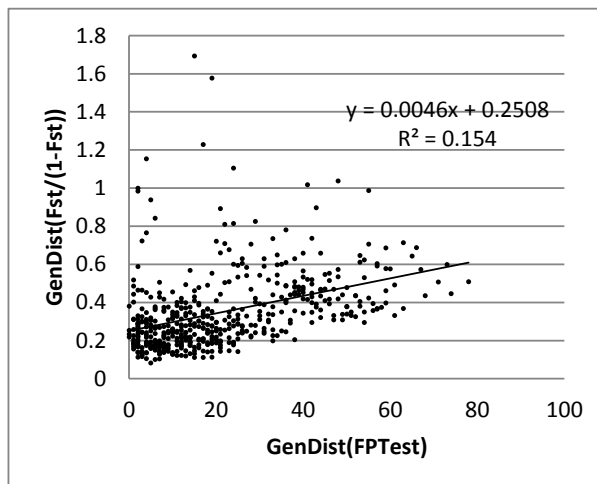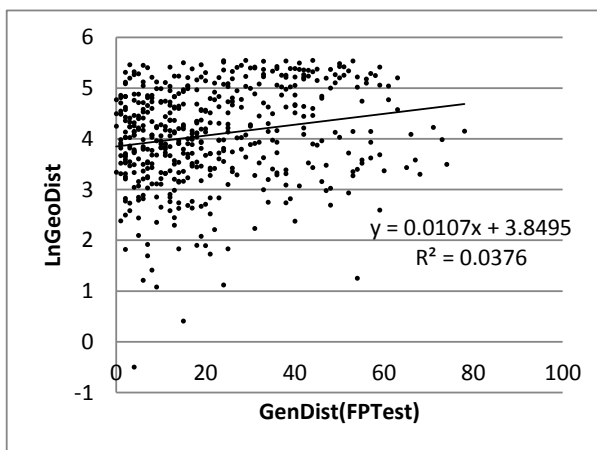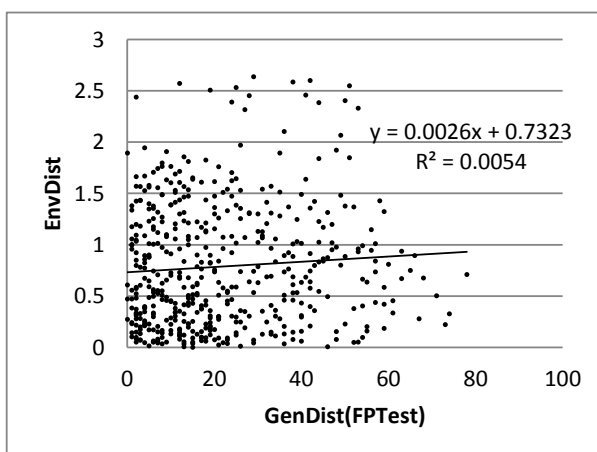

|    |          |          |          |
|----|----------|----------|----------|
| 44 | 0.320847 | 5.548142 | 2.385473 |
| 17 | 0.265777 | 2.770086 | 0.832829 |
| 48 | 1.038345 | 3.030134 | 0.079914 |
| 5  | 0.428217 | 3.163786 | 0.881293 |
| 27 | 0.541901 | 3.296577 | 0.194501 |
| 26 | 0.273486 | 3.355502 | 0.248729 |
| 7  | 0.450734 | 3.528417 | 0.557327 |
| 12 | 0.283818 | 3.676301 | 0.730946 |
| 6  | 0.363018 | 3.853546 | 0.325437 |
| 9  | 0.309518 | 3.685373 | 0.657816 |
| 19 | 0.317500 | 3.815071 | 0.201855 |
| 11 | 0.335960 | 3.900153 | 0.267721 |
| 29 | 0.825128 | 4.083621 | 0.045083 |
| 18 | 0.329936 | 4.122284 | 0.976427 |
| 25 | 0.334935 | 4.140273 | 0.143994 |
| 5  | 0.319254 | 4.220390 | 0.883215 |
| 9  | 0.377168 | 4.224203 | 0.932578 |
| 30 | 0.311096 | 4.252345 | 0.633359 |
| 23 | 0.350055 | 4.308515 | 0.425419 |
| 8  | 0.374385 | 4.604170 | 0.554879 |
| 15 | 0.429661 | 4.688040 | 0.593652 |
| 6  | 0.377842 | 4.718677 | 0.499676 |
| 7  | 0.428582 | 4.816970 | 0.082042 |
| 13 | 0.330247 | 4.840479 | 0.256546 |
| 11 | 0.401033 | 5.111928 | 0.343831 |
| 3  | 0.368040 | 5.200925 | 0.784664 |
| 7  | 0.507065 | 5.406319 | 1.559087 |
| 31 | 0.630672 | 5.419428 | 1.091108 |
| 33 | 0.735757 | 5.531530 | 1.573461 |
| 24 | 0.601235 | 5.542204 | 1.626956 |
| 65 | 0.643872 | 3.436243 | 0.752915 |
| 22 | 0.307241 | 2.218116 | 0.048465 |
| 44 | 0.435322 | 3.439135 | 1.027329 |
| 9  | 0.144465 | 2.857619 | 1.081558 |
| 10 | 0.259935 | 3.217275 | 1.390155 |
| 5  | 0.170613 | 3.609566 | 1.563775 |
| 11 | 0.250307 | 3.903184 | 1.158265 |
| 8  | 0.174545 | 3.439135 | 1.490645 |
| 2  | 0.178449 | 3.716008 | 1.034683 |
| 6  | 0.188295 | 3.797734 | 0.565108 |
| 46 | 0.516330 | 3.968214 | 0.877911 |
| 1  | 0.226202 | 3.922963 | 0.143599 |
| 8  | 0.223466 | 4.032292 | 0.976822 |
| 12 | 0.214385 | 4.066288 | 1.716043 |
| 8  | 0.229077 | 4.072610 | 1.765407 |
| 13 | 0.147978 | 4.122122 | 1.466188 |
| 6  | 0.167273 | 4.173772 | 1.258248 |
| 25 | 0.289066 | 4.514917 | 1.387708 |
| 2  | 0.291628 | 4.625953 | 1.426481 |
| 23 | 0.326650 | 4.637153 | 1.332505 |
| 10 | 0.224075 | 4.743366 | 0.914871 |
| 4  | 0.192055 | 4.766949 | 1.089374 |
| 6  | 0.178389 | 5.051969 | 1.176659 |
| 20 | 0.294951 | 5.146855 | 1.617493 |
| 24 | 0.367198 | 5.360400 | 2.391915 |
| 48 | 0.419779 | 5.373842 | 1.923937 |
| 50 | 0.478920 | 5.489268 | 2.406289 |
| 41 | 0.416551 | 5.500156 | 2.459785 |
| 43 | 0.897667 | 3.530470 | 0.801379 |
| 21 | 0.892651 | 2.523326 | 0.274415 |
| 74 | 0.446256 | 3.503453 | 0.328643 |
| 55 | 0.987396 | 3.526066 | 0.637240 |
| 60 | 0.576942 | 3.376221 | 0.810860 |

|    |          |          |          |
|----|----------|----------|----------|
| 54 | 0.624508 | 3.401531 | 0.405350 |
| 57 | 0.592793 | 3.627802 | 0.737730 |
| 67 | 0.573300 | 3.586016 | 0.281768 |
| 59 | 0.686999 | 3.691626 | 0.187807 |
| 19 | 1.578266 | 3.930845 | 0.124997 |
| 66 | 0.688521 | 4.091841 | 0.896514 |
| 73 | 0.600007 | 3.989354 | 0.223907 |
| 53 | 0.611370 | 4.149622 | 0.963128 |
| 57 | 0.603556 | 4.151040 | 1.012492 |
| 78 | 0.508872 | 4.155440 | 0.713273 |
| 71 | 0.508261 | 4.229895 | 0.505333 |
| 40 | 0.565401 | 4.520157 | 0.634793 |
| 63 | 0.714679 | 4.582209 | 0.673566 |
| 42 | 0.737728 | 4.644102 | 0.579590 |
| 55 | 0.706803 | 4.747190 | 0.161956 |
| 61 | 0.492578 | 4.774238 | 0.336459 |
| 59 | 0.578542 | 5.064302 | 0.423744 |
| 45 | 0.547143 | 5.155601 | 0.864578 |
| 41 | 1.019039 | 5.371196 | 1.639001 |
| 17 | 1.228899 | 5.385091 | 1.171022 |
| 15 | 1.693544 | 5.502849 | 1.653374 |
| 24 | 1.106139 | 5.514154 | 1.706870 |
| 22 | 0.710059 | 3.423611 | 1.075794 |
| 31 | 0.238382 | 2.237513 | 1.130022 |
| 12 | 0.422865 | 2.855320 | 1.438620 |
| 17 | 0.290189 | 3.467609 | 1.612239 |
| 11 | 0.347185 | 3.843316 | 1.206730 |
| 14 | 0.282773 | 3.151453 | 1.539109 |
| 24 | 0.277171 | 3.555919 | 1.083148 |
| 16 | 0.302573 | 3.640477 | 0.613572 |
| 24 | 0.815106 | 3.815512 | 0.926376 |
| 23 | 0.288378 | 3.726898 | 0.095134 |
| 30 | 0.353987 | 3.888959 | 1.025287 |
| 10 | 0.350407 | 3.904595 | 1.764508 |
| 14 | 0.376412 | 3.912623 | 1.813871 |
| 35 | 0.250851 | 3.975936 | 1.514652 |
| 28 | 0.281074 | 4.030872 | 1.306712 |
| 3  | 0.464973 | 4.416790 | 1.436172 |
| 20 | 0.410427 | 4.544677 | 1.474945 |
| 1  | 0.518709 | 4.549657 | 1.380969 |
| 12 | 0.374230 | 4.664759 | 0.963336 |
| 18 | 0.284852 | 4.689879 | 1.137839 |
| 16 | 0.303671 | 4.993218 | 1.225124 |
| 2  | 0.465430 | 5.093627 | 1.665957 |
| 2  | 0.589135 | 5.317188 | 2.440380 |
| 26 | 0.630886 | 5.331172 | 1.972401 |
| 28 | 0.706833 | 5.451081 | 2.454754 |
| 19 | 0.553426 | 5.462348 | 2.508249 |
| 53 | 0.380936 | 3.276390 | 0.054228 |
| 34 | 0.650085 | 3.204777 | 0.362826 |
| 39 | 0.463307 | 2.823163 | 0.536445 |
| 33 | 0.257404 | 3.002708 | 0.130936 |
| 36 | 0.413163 | 3.294725 | 0.463316 |
| 46 | 0.392890 | 3.163786 | 0.007354 |
| 38 | 0.448510 | 3.319626 | 0.462222 |
| 2  | 0.984609 | 3.650658 | 0.149418 |
| 45 | 0.410207 | 3.880326 | 1.170928 |
| 52 | 0.326468 | 3.726898 | 0.050507 |
| 32 | 0.339956 | 3.937886 | 0.688714 |
| 36 | 0.489225 | 3.938860 | 0.738077 |
| 57 | 0.369104 | 3.940027 | 0.438858 |
| 50 | 0.379393 | 4.032824 | 0.230918 |
| 19 | 0.184741 | 4.374246 | 0.360379 |

|    |          |          |          |
|----|----------|----------|----------|
| 42 | 0.399826 | 4.448399 | 0.399151 |
| 21 | 0.199197 | 4.516339 | 0.305176 |
| 34 | 0.545019 | 4.632883 | 0.112458 |
| 40 | 0.344098 | 4.663156 | 0.062045 |
| 38 | 0.442370 | 4.982373 | 0.149330 |
| 24 | 0.178248 | 5.081094 | 0.590164 |
| 20 | 0.721700 | 5.311579 | 1.364586 |
| 4  | 0.766605 | 5.326322 | 0.896608 |
| 6  | 0.843201 | 5.450738 | 1.378960 |
| 3  | 0.723290 | 5.462645 | 1.432455 |
| 19 | 0.247097 | 2.081938 | 0.308598 |
| 14 | 0.132012 | 3.170945 | 0.482217 |
| 20 | 0.188256 | 3.677819 | 0.076708 |
| 17 | 0.145924 | 2.640485 | 0.409087 |
| 7  | 0.137526 | 3.258481 | 0.046875 |
| 15 | 0.165035 | 3.364188 | 0.516450 |
| 55 | 0.424193 | 3.584629 | 0.203646 |
| 8  | 0.185812 | 3.512441 | 1.225157 |
| 1  | 0.181138 | 3.676301 | 0.104735 |
| 21 | 0.176008 | 3.712596 | 0.634485 |
| 17 | 0.196388 | 3.721347 | 0.683849 |
| 4  | 0.106520 | 3.790759 | 0.384630 |
| 3  | 0.123626 | 3.861992 | 0.176690 |
| 34 | 0.226033 | 4.303524 | 0.306150 |
| 11 | 0.289834 | 4.441356 | 0.344923 |
| 32 | 0.298496 | 4.452485 | 0.250947 |
| 19 | 0.189926 | 4.578929 | 0.166687 |
| 13 | 0.119474 | 4.606869 | 0.007816 |
| 15 | 0.147115 | 4.934762 | 0.095101 |
| 29 | 0.241526 | 5.040776 | 0.535935 |
| 33 | 0.336841 | 5.276174 | 1.310358 |
| 57 | 0.365294 | 5.290839 | 0.842379 |
| 59 | 0.398236 | 5.416189 | 1.324731 |
| 50 | 0.340403 | 5.427985 | 1.378227 |
| 5  | 0.283643 | 2.851284 | 0.173620 |
| 1  | 0.402200 | 3.523120 | 0.231890 |
| 2  | 0.253633 | 1.824549 | 0.100490 |
| 12 | 0.256339 | 2.910174 | 0.355472 |
| 4  | 0.310094 | 3.044999 | 0.825047 |
| 36 | 0.781455 | 3.335058 | 0.512244 |
| 11 | 0.327731 | 3.322875 | 1.533754 |
| 18 | 0.255527 | 3.451574 | 0.413333 |
| 2  | 0.273236 | 3.530177 | 0.325888 |
| 2  | 0.330444 | 3.538928 | 0.375252 |
| 23 | 0.262907 | 3.609024 | 0.076032 |
| 16 | 0.273788 | 3.702782 | 0.131907 |
| 15 | 0.461844 | 4.200055 | 0.002447 |
| 8  | 0.418567 | 4.345622 | 0.036325 |
| 13 | 0.494187 | 4.365389 | 0.057650 |
| 0  | 0.381795 | 4.502805 | 0.475284 |
| 6  | 0.302747 | 4.533674 | 0.300781 |
| 4  | 0.347576 | 4.884770 | 0.213496 |
| 10 | 0.455711 | 4.995657 | 0.227338 |
| 14 | 0.569293 | 5.241641 | 1.001760 |
| 38 | 0.630108 | 5.256974 | 0.533782 |
| 40 | 0.659008 | 5.387152 | 1.016134 |
| 31 | 0.590548 | 5.399384 | 1.069630 |
| 6  | 0.273285 | 2.823757 | 0.405510 |
| 3  | 0.143472 | 2.737609 | 0.073130 |
| 7  | 0.128475 | 1.921325 | 0.529092 |
| 1  | 0.168959 | 2.385086 | 0.998667 |
| 41 | 0.521407 | 3.076851 | 0.685863 |
| 6  | 0.202593 | 3.503453 | 1.707374 |

|    |          |          |          |
|----|----------|----------|----------|
| 13 | 0.219317 | 3.211247 | 0.586952 |
| 7  | 0.163981 | 3.550766 | 0.152268 |
| 3  | 0.245133 | 3.550766 | 0.201632 |
| 18 | 0.141708 | 3.544432 | 0.097587 |
| 11 | 0.197275 | 3.680847 | 0.305527 |
| 20 | 0.265644 | 4.138202 | 0.176067 |
| 3  | 0.301046 | 4.243339 | 0.137294 |
| 18 | 0.327299 | 4.315353 | 0.231270 |
| 5  | 0.221061 | 4.456786 | 0.648904 |
| 1  | 0.189445 | 4.492449 | 0.474401 |
| 1  | 0.203112 | 4.861129 | 0.387116 |
| 15 | 0.274972 | 4.972379 | 0.053718 |
| 19 | 0.353499 | 5.226015 | 0.828141 |
| 43 | 0.392345 | 5.242012 | 0.360162 |
| 45 | 0.471075 | 5.376435 | 0.842514 |
| 36 | 0.405709 | 5.389209 | 0.896010 |
| 3  | 0.243203 | 3.472898 | 0.332380 |
| 13 | 0.218522 | 2.989211 | 0.123582 |
| 5  | 0.272786 | 3.074081 | 0.593157 |
| 35 | 0.601805 | 3.409166 | 0.280354 |
| 12 | 0.233221 | 3.851211 | 1.301864 |
| 19 | 0.207765 | 3.466673 | 0.181443 |
| 1  | 0.258212 | 3.824502 | 0.557778 |
| 3  | 0.326455 | 3.820346 | 0.607141 |
| 24 | 0.191129 | 3.772301 | 0.307922 |
| 17 | 0.209762 | 3.890595 | 0.099983 |
| 14 | 0.189685 | 4.207971 | 0.229443 |
| 9  | 0.239833 | 4.250065 | 0.268215 |
| 12 | 0.223838 | 4.367674 | 0.174240 |
| 1  | 0.310370 | 4.495020 | 0.243394 |
| 7  | 0.177674 | 4.531201 | 0.068891 |
| 5  | 0.272740 | 4.886054 | 0.018394 |
| 9  | 0.174118 | 4.991249 | 0.459228 |
| 13 | 0.399016 | 5.240847 | 1.233650 |
| 37 | 0.441302 | 5.256870 | 0.765672 |
| 39 | 0.441559 | 5.390897 | 1.248024 |
| 30 | 0.392767 | 5.403758 | 1.301519 |
| 10 | 0.138760 | 2.656055 | 0.455962 |
| 2  | 0.139301 | 2.775086 | 0.925537 |
| 38 | 0.509158 | 3.093313 | 0.612734 |
| 9  | 0.210907 | 3.116178 | 1.634244 |
| 16 | 0.177529 | 3.238286 | 0.513823 |
| 4  | 0.175552 | 3.339322 | 0.225398 |
| 0  | 0.254147 | 3.348851 | 0.274762 |
| 21 | 0.143660 | 3.426540 | 0.024457 |
| 14 | 0.174889 | 3.541829 | 0.232397 |
| 17 | 0.264700 | 4.103304 | 0.102937 |
| 6  | 0.267445 | 4.262116 | 0.064164 |
| 15 | 0.288979 | 4.284414 | 0.158140 |
| 2  | 0.262225 | 4.432482 | 0.575774 |
| 4  | 0.183660 | 4.465908 | 0.401271 |
| 2  | 0.220148 | 4.838185 | 0.313986 |
| 12 | 0.274439 | 4.953924 | 0.126848 |
| 16 | 0.387235 | 5.209541 | 0.901271 |
| 40 | 0.469927 | 5.225424 | 0.433292 |
| 42 | 0.497210 | 5.359789 | 0.915644 |
| 33 | 0.441176 | 5.372404 | 0.969140 |
| 8  | 0.150516 | 1.415853 | 0.469575 |
| 48 | 0.534804 | 2.700018 | 0.156772 |
| 1  | 0.185388 | 3.318540 | 1.178282 |
| 6  | 0.159957 | 2.893700 | 0.057861 |
| 14 | 0.176708 | 3.341801 | 0.681360 |
| 10 | 0.242039 | 3.340739 | 0.730724 |

|    |          |          |          |
|----|----------|----------|----------|
| 11 | 0.123060 | 3.325396 | 0.431504 |
| 4  | 0.136189 | 3.494080 | 0.223565 |
| 27 | 0.249824 | 4.024101 | 0.353025 |
| 4  | 0.294854 | 4.148517 | 0.391798 |
| 25 | 0.313309 | 4.220830 | 0.297822 |
| 12 | 0.194561 | 4.375757 | 0.119812 |
| 6  | 0.156183 | 4.414010 | 0.054691 |
| 8  | 0.167516 | 4.807458 | 0.141976 |
| 22 | 0.255046 | 4.924714 | 0.582810 |
| 26 | 0.364066 | 5.189172 | 1.357232 |
| 50 | 0.377307 | 5.205709 | 0.889254 |
| 52 | 0.435817 | 5.344628 | 1.371606 |
| 43 | 0.376024 | 5.357812 | 1.425102 |
| 40 | 0.533265 | 2.384165 | 0.312804 |
| 7  | 0.178615 | 3.235536 | 0.708707 |
| 14 | 0.193049 | 2.636196 | 0.411715 |
| 6  | 0.196629 | 3.216473 | 1.150935 |
| 2  | 0.285418 | 3.213260 | 1.200299 |
| 19 | 0.144833 | 3.178054 | 0.901080 |
| 12 | 0.175295 | 3.374853 | 0.693140 |
| 19 | 0.275664 | 3.948162 | 0.822600 |
| 4  | 0.291680 | 4.081935 | 0.861373 |
| 17 | 0.353072 | 4.158727 | 0.767397 |
| 4  | 0.272006 | 4.322675 | 0.349763 |
| 2  | 0.177309 | 4.363099 | 0.524266 |
| 0  | 0.233806 | 4.773393 | 0.611551 |
| 14 | 0.306055 | 4.894401 | 1.052385 |
| 18 | 0.365124 | 5.165985 | 1.826808 |
| 42 | 0.449662 | 5.182963 | 1.358829 |
| 44 | 0.464931 | 5.324911 | 1.841181 |
| 35 | 0.428772 | 5.338355 | 1.894677 |
| 47 | 0.469372 | 2.985177 | 1.021510 |
| 54 | 0.531132 | 1.255616 | 0.098911 |
| 34 | 0.501365 | 2.756840 | 0.838132 |
| 38 | 0.453078 | 2.740840 | 0.887495 |
| 59 | 0.462380 | 2.599722 | 0.588276 |
| 52 | 0.435394 | 2.936513 | 0.380336 |
| 21 | 0.661518 | 3.715765 | 0.509797 |
| 44 | 0.659555 | 3.901366 | 0.548569 |
| 23 | 0.678268 | 3.975373 | 0.454594 |
| 36 | 0.610152 | 4.169916 | 0.036960 |
| 42 | 0.430007 | 4.216415 | 0.211463 |
| 40 | 0.418952 | 4.678235 | 0.298748 |
| 26 | 0.606002 | 4.810964 | 0.739581 |
| 22 | 0.810309 | 5.102850 | 1.514004 |
| 2  | 1.000827 | 5.120804 | 1.046025 |
| 4  | 1.154016 | 5.271049 | 1.528378 |
| 5  | 0.938699 | 5.285181 | 1.581873 |
| 7  | 0.190930 | 3.037833 | 1.120421 |
| 13 | 0.241958 | 2.302585 | 1.859642 |
| 9  | 0.250441 | 2.358965 | 1.909006 |
| 12 | 0.160344 | 2.766948 | 1.609786 |
| 5  | 0.176269 | 2.794228 | 1.401847 |
| 26 | 0.278723 | 3.749739 | 1.531307 |
| 3  | 0.298013 | 4.029273 | 1.570080 |
| 24 | 0.305227 | 3.984344 | 1.476104 |
| 11 | 0.212438 | 4.176692 | 1.058470 |
| 5  | 0.159889 | 4.214791 | 1.232973 |
| 7  | 0.185055 | 4.662401 | 1.320258 |
| 21 | 0.258266 | 4.799667 | 1.761092 |
| 25 | 0.286795 | 5.089200 | 2.535514 |
| 49 | 0.309110 | 5.106794 | 2.067536 |
| 51 | 0.350044 | 5.255097 | 2.549888 |

|    |          |           |          |
|----|----------|-----------|----------|
| 42 | 0.296099 | 5.268889  | 2.603384 |
| 20 | 0.206125 | 2.714695  | 0.739221 |
| 16 | 0.208205 | 2.689886  | 0.788584 |
| 5  | 0.160551 | 2.443216  | 0.489365 |
| 2  | 0.167898 | 2.830858  | 0.281426 |
| 33 | 0.227472 | 3.634423  | 0.410886 |
| 10 | 0.248812 | 3.827989  | 0.449658 |
| 31 | 0.248276 | 3.912623  | 0.355683 |
| 18 | 0.242274 | 4.118061  | 0.061951 |
| 12 | 0.172930 | 4.167285  | 0.112552 |
| 14 | 0.218981 | 4.647846  | 0.199837 |
| 28 | 0.224867 | 4.784069  | 0.640671 |
| 32 | 0.307604 | 5.083018  | 1.415093 |
| 56 | 0.358369 | 5.101390  | 0.947115 |
| 58 | 0.374742 | 5.254574  | 1.429467 |
| 49 | 0.338992 | 5.268992  | 1.482962 |
| 4  | 0.241648 | -0.494296 | 0.049364 |
| 25 | 0.141956 | 1.835776  | 0.249856 |
| 18 | 0.178877 | 1.906575  | 0.457795 |
| 13 | 0.211998 | 3.505858  | 0.328335 |
| 10 | 0.261578 | 3.836006  | 0.289563 |
| 11 | 0.244083 | 3.806218  | 0.383538 |
| 2  | 0.223346 | 4.034418  | 0.801172 |
| 8  | 0.167065 | 4.081259  | 0.626669 |
| 6  | 0.175945 | 4.586497  | 0.539384 |
| 8  | 0.215511 | 4.733387  | 0.098550 |
| 12 | 0.369476 | 5.042457  | 0.675872 |
| 36 | 0.399315 | 5.061138  | 0.207894 |
| 38 | 0.484401 | 5.217541  | 0.690246 |
| 29 | 0.402712 | 5.232124  | 0.743742 |
| 21 | 0.195619 | 1.733424  | 0.299219 |
| 14 | 0.212413 | 1.838961  | 0.507159 |
| 17 | 0.340202 | 3.492560  | 0.377699 |
| 6  | 0.371022 | 3.824284  | 0.338926 |
| 15 | 0.409539 | 3.797285  | 0.432902 |
| 2  | 0.285542 | 4.027492  | 0.850536 |
| 4  | 0.217815 | 4.074992  | 0.676033 |
| 2  | 0.206220 | 4.583333  | 0.588748 |
| 12 | 0.313781 | 4.730480  | 0.147914 |
| 16 | 0.395869 | 5.040582  | 0.626509 |
| 40 | 0.453149 | 5.059298  | 0.158530 |
| 42 | 0.520901 | 5.216076  | 0.640882 |
| 33 | 0.377326 | 5.230681  | 0.694378 |
| 7  | 0.103926 | 1.697449  | 0.207940 |
| 38 | 0.205680 | 3.393165  | 0.078480 |
| 15 | 0.233387 | 3.721831  | 0.039707 |
| 36 | 0.246959 | 3.733136  | 0.133683 |
| 23 | 0.146580 | 3.977623  | 0.551317 |
| 17 | 0.112003 | 4.030339  | 0.376814 |
| 19 | 0.113833 | 4.561741  | 0.289529 |
| 33 | 0.198506 | 4.711061  | 0.151305 |
| 37 | 0.308091 | 5.027886  | 0.925728 |
| 61 | 0.331458 | 5.047096  | 0.457749 |
| 63 | 0.369531 | 5.206805  | 0.940102 |
| 54 | 0.295929 | 5.221706  | 0.993597 |
| 31 | 0.264419 | 3.280535  | 0.129460 |
| 8  | 0.273697 | 3.685875  | 0.168233 |
| 29 | 0.279604 | 3.645450  | 0.074257 |
| 16 | 0.162589 | 3.909018  | 0.343377 |
| 10 | 0.128403 | 3.962906  | 0.168874 |
| 12 | 0.122270 | 4.518631  | 0.081589 |
| 26 | 0.241081 | 4.674790  | 0.359245 |
| 30 | 0.330049 | 5.000518  | 1.133668 |



|    |          |          |          |
|----|----------|----------|----------|
| 54 | 0.350490 | 5.020057 | 0.665689 |
| 56 | 0.394634 | 5.183075 | 1.148041 |
| 47 | 0.309634 | 5.198221 | 1.201537 |
| 23 | 0.190310 | 2.843164 | 0.038773 |
| 2  | 0.113699 | 2.499795 | 0.055203 |
| 15 | 0.336798 | 3.165475 | 0.472837 |
| 21 | 0.192383 | 3.285038 | 0.298334 |
| 19 | 0.278038 | 4.197052 | 0.211049 |
| 5  | 0.082353 | 4.403788 | 0.229785 |
| 1  | 0.444484 | 4.815350 | 1.004208 |
| 23 | 0.508990 | 4.839293 | 0.536229 |
| 25 | 0.595166 | 5.034091 | 1.018581 |
| 16 | 0.478652 | 5.052033 | 1.072077 |
| 21 | 0.235141 | 2.839663 | 0.093976 |
| 8  | 0.359640 | 3.118392 | 0.511610 |
| 2  | 0.238278 | 3.253084 | 0.337107 |
| 4  | 0.308703 | 4.146463 | 0.249822 |
| 18 | 0.188063 | 4.348341 | 0.191012 |
| 22 | 0.504972 | 4.778535 | 0.965435 |
| 46 | 0.554269 | 4.804021 | 0.497456 |
| 48 | 0.573664 | 5.007965 | 0.979808 |
| 39 | 0.481325 | 5.026968 | 1.033304 |
| 13 | 0.372421 | 2.450143 | 0.417634 |
| 19 | 0.221445 | 2.676903 | 0.243131 |
| 17 | 0.325242 | 3.995077 | 0.155846 |
| 3  | 0.116508 | 4.242621 | 0.284988 |
| 1  | 0.486551 | 4.711510 | 1.059411 |
| 25 | 0.533270 | 4.738126 | 0.591432 |
| 27 | 0.584362 | 4.951734 | 1.073784 |
| 18 | 0.491081 | 4.971271 | 1.127280 |
| 6  | 0.150537 | 1.214913 | 0.174503 |
| 4  | 0.135969 | 3.762130 | 0.261788 |
| 10 | 0.315652 | 4.063198 | 0.702622 |
| 14 | 0.349290 | 4.603769 | 1.477044 |
| 38 | 0.357355 | 4.633466 | 1.009066 |
| 40 | 0.480083 | 4.868918 | 1.491418 |
| 31 | 0.389410 | 4.890274 | 1.544914 |
| 2  | 0.137379 | 3.685122 | 0.087285 |
| 16 | 0.202898 | 4.008423 | 0.528119 |
| 20 | 0.296454 | 4.571820 | 1.302541 |
| 44 | 0.361646 | 4.602366 | 0.834563 |
| 46 | 0.418243 | 4.844030 | 1.316915 |
| 37 | 0.292513 | 4.865841 | 1.370411 |
| 14 | 0.256394 | 2.745988 | 0.440834 |
| 18 | 0.368012 | 4.041471 | 1.215256 |
| 42 | 0.349384 | 4.092510 | 0.747278 |
| 44 | 0.469160 | 4.467516 | 1.229630 |
| 35 | 0.350753 | 4.499143 | 1.283126 |
| 4  | 0.453522 | 3.731699 | 0.774423 |
| 28 | 0.469239 | 3.801985 | 0.306444 |
| 30 | 0.542572 | 4.280686 | 0.788796 |
| 21 | 0.444054 | 4.319353 | 0.842292 |
| 24 | 0.190020 | 1.124930 | 0.467979 |
| 26 | 0.252803 | 3.425565 | 0.014374 |
| 17 | 0.209234 | 3.516013 | 0.067869 |
| 2  | 0.269832 | 3.319987 | 0.482352 |
| 7  | 0.269192 | 3.420019 | 0.535848 |
| 9  | 0.279103 | 1.081805 | 0.053496 |

**Correlations between environmental, genetic, geographical and climatic distances  
with Holm-Bonferroni correction**

The climate distances are based on the 19 Bioclim variables, each represented by a distance matrix  
Values are sorted by decreasing p value

| x                     | y         | r        | p       | Holm-Bonferroni p<br>value for significance<br>at alpha=0.05 | significant? |
|-----------------------|-----------|----------|---------|--------------------------------------------------------------|--------------|
| EnvDist               | Bio1Dist  | 0.91554  | 0.00001 | 0.0006250                                                    | *            |
| EnvDist               | Bio5Dist  | 0.91258  | 0.00001 | 0.0006329                                                    | *            |
| EnvDist               | Bio8Dist  | 0.90237  | 0.00001 | 0.0006410                                                    | *            |
| EnvDist               | Bio9Dist  | 0.90434  | 0.00001 | 0.0006494                                                    | *            |
| EnvDist               | Bio10Dist | 0.90402  | 0.00001 | 0.0006579                                                    | *            |
| EnvDist               | Bio11Dist | 0.90237  | 0.00001 | 0.0006667                                                    | *            |
| LnGeoDist             | Bio1Dist  | 0.42727  | 0.00001 | 0.0006757                                                    | *            |
| LnGeoDist             | Bio4Dist  | 0.50071  | 0.00001 | 0.0006849                                                    | *            |
| LnGeoDist             | Bio9Dist  | 0.44859  | 0.00001 | 0.0006944                                                    | *            |
| LnGeoDist             | Bio10Dist | 0.44985  | 0.00001 | 0.0007042                                                    | *            |
| LnGeoDist             | Bio8Dist  | 0.39303  | 0.00003 | 0.0007143                                                    | *            |
| LnGeoDist             | Bio11Dist | 0.39303  | 0.00004 | 0.0007246                                                    | *            |
| LnGeoDist             | Bio6Dist  | 0.28241  | 0.00032 | 0.0007353                                                    | *            |
| LnGeoDist             | Bio15Dist | 0.26897  | 0.00049 | 0.0007463                                                    | *            |
| LnGeoDist             | Bio5Dist  | 0.31444  | 0.00058 | 0.0007576                                                    | *            |
| GenDist (FPTest)      | Bio6Dist  | 0.19363  | 0.03659 | 0.0007692                                                    | ns           |
| GenDist (FPTest)      | Bio3Dist  | -0.19444 | 0.04131 | 0.0007813                                                    | ns           |
| GenDist (AllelRich)   | Bio3Dist  | -0.19179 | 0.04505 | 0.0007937                                                    | ns           |
| GenDist (AllelRich)   | Bio6Dist  | 0.18201  | 0.04702 | 0.0008065                                                    | ns           |
| GenDist (Fst/(1-Fst)) | Bio6Dist  | 0.20963  | 0.04831 | 0.0008197                                                    | ns           |
| GenDist (Fst/(1-Fst)) | Bio15Dist | 0.17141  | 0.06293 | 0.0008333                                                    | ns           |
| GenDist (FPTest)      | Bio15Dist | 0.13674  | 0.06780 | 0.0008475                                                    | ns           |
| GenDist (AllelRich)   | Bio15Dist | 0.13526  | 0.06876 | 0.0008621                                                    | ns           |
| GenDist (FPTest)      | Bio2Dist  | -0.16190 | 0.07915 | 0.0008772                                                    | ns           |
| LnGeoDist             | Bio12Dist | 0.10440  | 0.09069 | 0.0008929                                                    | ns           |
| GenDist (AllelRich)   | Bio2Dist  | -0.15171 | 0.10209 | 0.0009091                                                    | ns           |
| LnGeoDist             | Bio13Dist | 0.09945  | 0.11376 | 0.0009259                                                    | ns           |
| LnGeoDist             | Bio16Dist | 0.09880  | 0.11624 | 0.0009434                                                    | ns           |
| LnGeoDist             | Bio19Dist | 0.09880  | 0.11735 | 0.0009615                                                    | ns           |
| GenDist (Fst/(1-Fst)) | Bio9Dist  | 0.17803  | 0.12612 | 0.0009804                                                    | ns           |
| GenDist (Fst/(1-Fst)) | Bio10Dist | 0.17891  | 0.12907 | 0.0010000                                                    | ns           |
| GenDist (Fst/(1-Fst)) | Bio1Dist  | 0.16534  | 0.16711 | 0.0010204                                                    | ns           |
| EnvDist               | Bio15Dist | 0.10513  | 0.17761 | 0.0010417                                                    | ns           |
| GenDist (Fst/(1-Fst)) | Bio3Dist  | -0.14931 | 0.22781 | 0.0010638                                                    | ns           |
| GenDist (FPTest)      | Bio10Dist | 0.11428  | 0.22862 | 0.0010870                                                    | ns           |
| GenDist (FPTest)      | Bio9Dist  | 0.11230  | 0.23204 | 0.0011111                                                    | ns           |
| GenDist (AllelRich)   | Bio10Dist | 0.11179  | 0.24000 | 0.0011364                                                    | ns           |
| GenDist (Fst/(1-Fst)) | Bio11Dist | 0.13711  | 0.24281 | 0.0011628                                                    | ns           |
| GenDist (Fst/(1-Fst)) | Bio8Dist  | 0.13711  | 0.24468 | 0.0011905                                                    | ns           |
| GenDist (AllelRich)   | Bio9Dist  | 0.10971  | 0.24667 | 0.0012195                                                    | ns           |
| GenDist (Fst/(1-Fst)) | Bio19Dist | -0.10270 | 0.24740 | 0.0012500                                                    | ns           |
| GenDist (Fst/(1-Fst)) | Bio16Dist | -0.10270 | 0.25023 | 0.0012821                                                    | ns           |
| GenDist (Fst/(1-Fst)) | Bio5Dist  | 0.13763  | 0.25946 | 0.0013158                                                    | ns           |
| GenDist (FPTest)      | Bio1Dist  | 0.10814  | 0.26062 | 0.0013514                                                    | ns           |
| GenDist (Fst/(1-Fst)) | Bio12Dist | -0.09493 | 0.27508 | 0.0013889                                                    | ns           |
| GenDist (AllelRich)   | Bio1Dist  | 0.10539  | 0.27532 | 0.0014286                                                    | ns           |
| EnvDist               | Bio3Dist  | -0.10070 | 0.31761 | 0.0014706                                                    | ns           |
| GenDist (FPTest)      | Bio7Dist  | -0.10692 | 0.31861 | 0.0015152                                                    | ns           |
| EnvDist               | Bio16Dist | -0.07132 | 0.33043 | 0.0015625                                                    | ns           |
| EnvDist               | Bio19Dist | -0.07132 | 0.33385 | 0.0016129                                                    | ns           |
| GenDist (AllelRich)   | Bio7Dist  | -0.10308 | 0.33999 | 0.0016667                                                    | ns           |
| GenDist (Fst/(1-Fst)) | Bio2Dist  | -0.11548 | 0.34446 | 0.0017241                                                    | ns           |
| GenDist (Fst/(1-Fst)) | Bio13Dist | -0.08028 | 0.37541 | 0.0017857                                                    | ns           |

|                       |           |          |         |           |    |
|-----------------------|-----------|----------|---------|-----------|----|
| GenDist (FPTest)      | Bio8Dist  | 0.08259  | 0.38303 | 0.0018519 | ns |
| GenDist (FPTest)      | Bio11Dist | 0.08259  | 0.38559 | 0.0019231 | ns |
| GenDist (AllelRich)   | Bio8Dist  | 0.08016  | 0.40074 | 0.0020000 | ns |
| GenDist (AllelRich)   | Bio11Dist | 0.08016  | 0.40277 | 0.0020833 | ns |
| EnvDist               | Bio13Dist | -0.05929 | 0.42456 | 0.0021739 | ns |
| EnvDist               | Bio12Dist | -0.05586 | 0.43929 | 0.0022727 | ns |
| EnvDist               | Bio6Dist  | 0.05842  | 0.50089 | 0.0023810 | ns |
| GenDist (FPTest)      | Bio5Dist  | 0.05956  | 0.54797 | 0.0025000 | ns |
| LnGeoDist             | Bio2Dist  | -0.04885 | 0.55098 | 0.0026316 | ns |
| LnGeoDist             | Bio7Dist  | -0.05474 | 0.55142 | 0.0027778 | ns |
| GenDist (AllelRich)   | Bio5Dist  | 0.05742  | 0.56637 | 0.0029412 | ns |
| GenDist (Fst/(1-Fst)) | Bio4Dist  | 0.05244  | 0.61209 | 0.0031250 | ns |
| EnvDist               | Bio2Dist  | -0.05129 | 0.61222 | 0.0033333 | ns |
| GenDist (Fst/(1-Fst)) | Bio7Dist  | -0.06408 | 0.64888 | 0.0035714 | ns |
| GenDist (AllelRich)   | Bio13Dist | 0.03404  | 0.65284 | 0.0038462 | ns |
| EnvDist               | Bio7Dist  | -0.04993 | 0.65702 | 0.0041667 | ns |
| GenDist (FPTest)      | Bio13Dist | 0.02844  | 0.70770 | 0.0045455 | ns |
| GenDist (FPTest)      | Bio4Dist  | -0.02236 | 0.77635 | 0.0050000 | ns |
| GenDist (AllelRich)   | Bio4Dist  | -0.02171 | 0.78775 | 0.0055556 | ns |
| LnGeoDist             | Bio3Dist  | 0.01256  | 0.88496 | 0.0062500 | ns |
| EnvDist               | Bio4Dist  | 0.01149  | 0.88712 | 0.0071429 | ns |
| GenDist (FPTest)      | Bio12Dist | -0.00395 | 0.95744 | 0.0083333 | ns |
| GenDist (AllelRich)   | Bio16Dist | 0.00375  | 0.96022 | 0.0100000 | ns |
| GenDist (AllelRich)   | Bio19Dist | 0.00375  | 0.96077 | 0.0125000 | ns |
| GenDist (FPTest)      | Bio16Dist | -0.00221 | 0.97680 | 0.0166667 | ns |
| GenDist (FPTest)      | Bio19Dist | -0.00221 | 0.97701 | 0.0250000 | ns |
| GenDist (AllelRich)   | Bio12Dist | 0.00107  | 0.98856 | 0.0500000 | ns |
