# Supplementary material for: Geography of Genetic Structure in Barley Wild Relative Hordeum vulgare subsp. spontaneum in Jordan
Source: PubMed Central journal article supplement (PMC4981475; doi:10.1371/journal.pone.0160745), 2016-08-11
Supplement: pone.0160745.s003.pdf [file pone.0160745.s003.pdf]

**S2 Table. Ecogeographical and genetic data for 32 *Spontaneum* populations collected in Jordan in 2012**

Geography of genetic structure in barley wild relative *Hordeum vulgare* subsp. *spontaneum* in Jordan

PloS ONE

Thormann I. et al.

| Site number | Collecting number | Latitude | Longitude  | Elevation (m) | Slope as recorded during collecting | Slope as extracted from DEM | Aspect as recorded during collecting |
|-------------|-------------------|----------|------------|---------------|-------------------------------------|-----------------------------|--------------------------------------|
| 1           | 9                 | 32.70233 | 35.72325   | 94            | undulating 3-8                      | 6.4072709                   | E                                    |
| 2           | 10                | 32.69611 | 35.7375278 | 119           | gently rolling 8-16                 | 2.0650151                   | E                                    |
| 3           | 7577              | 32.67656 | 35.8048333 | 467           | level 0-3                           | 2.094852                    | F                                    |
| 4           | 7581              | 32.59239 | 35.6669444 | 87            | undulating 3-8                      | 2.408005                    | E                                    |
| 5           | 7575              | 32.58686 | 35.9981944 | 475           | level 0-3                           | 0.6448038                   | F                                    |
| 6           | 7583              | 32.51183 | 35.6454444 | 119           | sloping 16-30                       | 5.736351                    | S                                    |
| 7           | 7561              | 32.47747 | 35.9696944 | 608           | level 0-3                           | 0.8024288                   | F                                    |
| 8           | 7584              | 32.43733 | 35.6918056 | 484           | gently rolling 8-16                 | 2.7060931                   | W                                    |
| 9           | 7586              | 32.37594 | 35.7365    | 785           | undulating 3-8                      | 2.862745                    | N                                    |
| 10          | 7571              | 32.33386 | 35.91375   | 957           | gently rolling 8-16                 | 2.789247                    | N                                    |
| 11          | 7566              | 32.32931 | 36.0926667 | 866           | level 0-3                           | 2.2942541                   | F                                    |
| 12          | 7588              | 32.32144 | 35.7501389 | 770           | sloping 16-30                       | 4.5872722                   | W                                    |
| 13          | 7640              | 32.27547 | 35.8913333 | 564           | undulating 3-8                      | 3.0051081                   | E                                    |
| 14          | 7570              | 32.23847 | 35.8894722 | 379           | undulating 3-8                      | 2.4141221                   | E                                    |
| 15          | 7569              | 32.14508 | 35.8566389 | 561           | gently rolling 8-16                 | 2.2644801                   | N                                    |
| 16          | 7599              | 32.13858 | 35.6468056 | 141           | gently rolling 8-16                 | 6.0931702                   | W                                    |
| 17          | 7568              | 32.11461 | 35.86625   | 629           | undulating 3-8                      | 4.2316108                   | E                                    |
| 18          | 7600              | 32.06989 | 35.7151389 | 1044          | gently rolling 8-16                 | 4.86167                     | W                                    |
| 19          | 7595              | 32.06694 | 35.7205833 | 1058          | level 0-3                           | 1.595687                    | F                                    |
| 20          | 7594              | 32.04581 | 35.7751667 | 911           | level 0-3                           | 1.337201                    | F                                    |
| 21          | 7596              | 32.01156 | 35.7337778 | 589           | level 0-3                           | 3.749177                    | F                                    |
| 22          | 7602              | 31.77919 | 35.7988333 | 805           | level 0-3                           | 0.8993503                   | F                                    |
| 23          | 7616              | 31.70953 | 35.9606111 | 709           | level 0-3                           | 0.3275474                   | F                                    |
| 24          | 7604              | 31.67036 | 35.7858889 | 745           | level 0-3                           | 0.3143624                   | F                                    |
| 25          | 1                 | 31.56639 | 35.7914167 | 646           | undulating 3-8                      | 2.3862491                   | W                                    |
| 26          | 7606              | 31.54019 | 35.7736389 | 677           | undulating 3-8                      | 3.9107339                   | E                                    |
| 27          | 7610              | 31.18831 | 35.6965833 | 773           | sloping 16-30                       | 5.5509439                   | N                                    |
| 28          | 7612              | 31.04872 | 35.7088611 | 1222          | level 0-3                           | 0.3617871                   | F                                    |
| 29          | 7628              | 30.68108 | 35.6222222 | 1566          | level 0-3                           | 6.893683                    | F                                    |
| 30          | 4                 | 30.65542 | 35.6101944 | 1257          | sloping 16-30                       | 8.1156244                   | S                                    |
| 31          | 7625              | 30.42178 | 35.512     | 1580          | level 0-3                           | 1.376532                    | F                                    |
| 32          | 7                 | 30.39875 | 35.4968611 | 1680          | level 0-3                           | 2.840307                    | F                                    |

| Site number | Aspect as extracted from DEM | Geology   | Soil texture | Soil colour | Mean annual temperature | Mean annual rainfall | Habitat      | Number of individuals for analysis |
|-------------|------------------------------|-----------|--------------|-------------|-------------------------|----------------------|--------------|------------------------------------|
| 1           | 302.355194                   | Limestone | clay-loam    | brown       | 19.97                   | 403                  | Shrubland    | 12                                 |
| 2           | 312.273712                   | Limestone | clay-loam    | brown       | 19.97                   | 403                  | Reserve      | 13                                 |
| 3           | 10.3992395                   | Limestone | clay-loam    | terra rosa  | 18.58                   | 408                  | Roadside     | 11                                 |
| 4           | 285.995789                   | Limestone | clay-loam    | brown       | 20.34                   | 380                  | Roadside     | 11                                 |
| 5           | 286.699188                   | Limestone | clay-loam    | brown       | 17.81                   | 317                  | Field margin | 12                                 |
| 6           | 302.176514                   | Limestone | silt         | beige       | 21.09                   | 336                  | Roadside     | 12                                 |
| 7           | 348.906311                   | Limestone | clay-loam    | terra rosa  | 17.48                   | 322                  | Roadside     | 12                                 |
| 8           | 262.793915                   | Limestone | clay-loam    | light brown | 18.65                   | 456                  | Shrubland    | 12                                 |
| 9           | 294.009491                   | Limestone | clay-loam    | terra rosa  | 17.46                   | 486                  | Roadside     | 12                                 |
| 10          | 338.75769                    | Limestone | clay-loam    | terra rosa  | 15.94                   | 393                  | Roadside     | 11                                 |
| 11          | 11.8390303                   | Limestone | clay-loam    | light brown | 16.21                   | 241                  | Field margin | 12                                 |
| 12          | 267.786285                   | Limestone | clay-loam    | terra rosa  | 15.62                   | 460                  | Roadside     | 12                                 |
| 13          | 152.316803                   | Limestone | clay-loam    | terra rosa  | 17.78                   | 366                  | Shrubland    | 11                                 |
| 14          | 193.680893                   | Limestone | clay-loam    | terra rosa  | 18.86                   | 274                  | Roadside     | 13                                 |
| 15          | 341.318115                   | Limestone | clay-loam    | terra rosa  | 17.73                   | 374                  | Roadside     | 12                                 |
| 16          | 299.574402                   | Limestone | silt         | beige       | 21.47                   | 258                  | Reserve      | 12                                 |
| 17          | 199.688904                   | Limestone | clay-loam    | terra rosa  | 17.68                   | 373                  | Field margin | 14                                 |
| 18          | 271.543213                   | Limestone | clay-loam    | terra rosa  | 15.90                   | 471                  | Roadside     | 11                                 |
| 19          | 192.2883                     | Limestone | clay-loam    | terra rosa  | 15.90                   | 471                  | Field margin | 12                                 |
| 20          | 2.97802091                   | Limestone | clay-loam    | terra rosa  | 16.63                   | 479                  | Roadside     | 12                                 |
| 21          | 193.436203                   | Limestone | clay-loam    | terra rosa  | 16.90                   | 491                  | Roadside     | 11                                 |
| 22          | 191.888702                   | Limestone | clay-loam    | light brown | 16.35                   | 378                  | Roadside     | 9                                  |
| 23          | 225                          | Limestone | clay-loam    | terra rosa  | 15.76                   | 229                  | Roadside     | 13                                 |
| 24          | 24.6768608                   | Limestone | clay-loam    | terra rosa  | 16.44                   | 352                  | Field margin | 12                                 |
| 25          | 193.272293                   | Limestone | silt         | beige       | 17.80                   | 263                  | Reserve      | 11                                 |
| 26          | 289.577911                   | Limestone | loam         | terra rosa  | 17.08                   | 274                  | Roadside     | 11                                 |
| 27          | 314.887695                   | Limestone | silt         | beige       | 16.90                   | 315                  | Roadside     | 12                                 |
| 28          | 50.1944313                   | Limestone | clay-loam    | terra rosa  | 15.62                   | 378                  | Roadside     | 12                                 |
| 29          | 268.658905                   | Limestone | silt         | grey        | 14.22                   | 313                  | Field margin | 12                                 |
| 30          | 231.830597                   | Sandstone | sandy-loam   | beige       | 14.64                   | 291                  | Reserve      | 12                                 |
| 31          | 42.7275505                   | Limestone | silt         | light brown | 12.55                   | 297                  | Roadside     | 8                                  |
| 32          | 252.942993                   | Limestone | silt         | light brown | 13.70                   | 258                  | Reserve      | 11                                 |

| Site number | Number of multi-locus genotypes | No of alleles | No of private alleles | Mean allelic richness | Observed heterozygosity (Ho) | Genetic cluster K = 2 | Genetic cluster K = 3 | Genetic cluster K = 4 | Mean plant height (cm) |
|-------------|---------------------------------|---------------|-----------------------|-----------------------|------------------------------|-----------------------|-----------------------|-----------------------|------------------------|
| 1           | 12                              | 105           | 1                     | 2.69                  | 0.0045                       | 1                     | 1                     | 1                     | 150                    |
| 2           | 13                              | 120           | 2                     | 3.08                  | 0.0042                       | 1                     | 1                     | 1                     | 60                     |
| 3           | 11                              | 100           | 0                     | 2.58                  | 0.0000                       | 1                     | 1                     | 1                     | 60                     |
| 4           | 11                              | 117           | 2                     | 3.05                  | 0.0000                       | 1                     | 1                     | 1                     | 100                    |
| 5           | 11                              | 52            | 0                     | 1.38                  | 0.0000                       | 2                     | 2                     | 3                     | 60                     |
| 6           | 12                              | 95            | 0                     | 2.46                  | 0.0000                       | 1                     | 1                     | 4                     | 70                     |
| 7           | 12                              | 73            | 1                     | 1.90                  | 0.0068                       | 2                     | 2                     | 3                     | 80                     |
| 8           | 12                              | 126           | 3                     | 3.24                  | 0.0045                       | 1                     | 1                     | 1                     | 80                     |
| 9           | 12                              | 107           | 4                     | 2.70                  | 0.0000                       | 1                     | 1                     | 1                     | 60                     |
| 10          | 11                              | 112           | 1                     | 2.92                  | 0.0049                       | 1                     | 1                     | 4                     | 80                     |
| 11          | 12                              | 106           | 0                     | 2.74                  | 0.0023                       | 2                     | 2                     | 3                     | 70                     |
| 12          | 12                              | 109           | 1                     | 2.83                  | 0.0023                       | 1                     | 1                     | 4                     | 60                     |
| 13          | 11                              | 119           | 1                     | 3.08                  | 0.0150                       | 1                     | 1                     | 4                     | 85                     |
| 14          | 13                              | 111           | 2                     | 2.82                  | 0.0249                       | 1                     | 1                     | 4                     | 70                     |
| 15          | 11                              | 71            | 1                     | 1.79                  | 0.0023                       | 2                     | 2                     | 4                     | 90                     |
| 16          | 12                              | 118           | 4                     | 3.02                  | 0.0000                       | 1                     | 1                     | 4                     | 60                     |
| 17          | 14                              | 125           | 1                     | 3.08                  | 0.0019                       | 1                     | 1                     | 4                     | 90                     |
| 18          | 10                              | 105           | 1                     | 2.76                  | 0.0025                       | 1                     | 1                     | 4                     | 100                    |
| 19          | 12                              | 109           | 1                     | 2.81                  | 0.0000                       | 1                     | 1                     | 1                     | 70                     |
| 20          | 12                              | 130           | 0                     | 3.30                  | 0.0023                       | 1                     | 1                     | 4                     | 80                     |
| 21          | 11                              | 123           | 1                     | 3.18                  | 0.0027                       | 1                     | 1                     | 4                     | 60                     |
| 22          | 9                               | 92            | 0                     | 2.46                  | 0.0030                       | 2                     | 2                     | 3                     | 75                     |
| 23          | 13                              | 115           | 2                     | 2.82                  | 0.0042                       | 2                     | 2                     | 3                     | 50                     |
| 24          | 12                              | 94            | 0                     | 2.42                  | 0.0045                       | 2                     | 2                     | 3                     | 80                     |
| 25          | 11                              | 107           | 1                     | 2.77                  | 0.0025                       | 1                     | 1                     | 4                     | 25                     |
| 26          | 11                              | 113           | 0                     | 2.94                  | 0.0049                       | 1                     | 1                     | 4                     | 35                     |
| 27          | 12                              | 111           | 0                     | 2.83                  | 0.0045                       | 1                     | 1                     | 4                     | 80                     |
| 28          | 12                              | 97            | 0                     | 2.52                  | 0.0000                       | 2                     | 2                     | 3                     | 70                     |
| 29          | 12                              | 93            | 3                     | 2.36                  | 0.0023                       | 1                     | 3                     | 2                     | 30                     |
| 30          | 12                              | 69            | 1                     | 1.83                  | 0.0000                       | 1                     | 3                     | 2                     | 20                     |
| 31          | 8                               | 67            | 0                     | 1.81                  | 0.0135                       | 1                     | 3                     | 2                     | 25                     |
| 32          | 11                              | 76            | 0                     | 2.01                  | 0.0049                       | 1                     | 3                     | 2                     | 20                     |
